# Supplementary material
Source: PubMed Central journal article supplement (PMC3975816)
Supplement: NIHMS530982-supplement-01.pdf [file NIHMS530982-supplement-01.pdf]

## Rare Non-Synonymous Exonic Variants in Addiction and Behavioral Disinhibition

### *Supplement 1*

|                                                                                                                                            |    |
|--------------------------------------------------------------------------------------------------------------------------------------------|----|
| Table S1. Descriptive Statistics for Constituent Measures of Substance Use and Behavioral Disinhibition. ....                              | 2  |
| Table S2. Phenotypic Correlations for Family Member Pairs .....                                                                            | 4  |
| Table S3. Correlations Among Residualized Phenotypes .....                                                                                 | 5  |
| Table S4. Covariates Significant in the Covariate Correction .....                                                                         | 6  |
| Figure S1. Phenotypic Scatterplot Prior to Inverse Normalization.....                                                                      | 7  |
| Figure S2. Phenotypic Scatterplot after Inverse Normalization .....                                                                        | 8  |
| Figure S3. Phenotype Histograms after Covariate Correction, Prior to Inverse Normalization.....                                            | 9  |
| Figure S4. Single Variant QQplot of Nicotine.....                                                                                          | 10 |
| Figure S5. Single Variant QQplot of Alcohol Consumption.....                                                                               | 11 |
| Figure S6. Single Variant QQplot of Alcohol Dependence.....                                                                                | 12 |
| Figure S7. Single Variant QQplot of Illicit Drug Use .....                                                                                 | 13 |
| Figure S8. Single Variant QQplot of Behavioral Disinhibition.....                                                                          | 14 |
| Figure S9. Single Variant QQplot of Nicotine in Individuals Exposed to Nicotine.....                                                       | 15 |
| Figure S10. Single Variant QQplot of Alcohol Consumption in Individuals Exposed to Alcohol .....                                           | 16 |
| Figure S11. Single Variant QQplot of Alcohol Dependence in Individuals Exposed to Alcohol                                                  | 17 |
| Figure S12. SNP-based Heritability as a function of GRM Cutoff for Alcohol Dependence, Illicit Drug Use, and Behavioral Disinhibition..... | 18 |
| Figure S13. Nonsynonymous Variants in Genes Associated with Smoking/Drinking by GWAS Meta-analysis. ....                                   | 19 |
| Figure S14. Single Variant QQplot of Nicotine, Considering Only Nonsynonymous Variants ..                                                  | 20 |
| Table S5. Summary of Burden Tests for 151 Candidate Addiction Genes .....                                                                  | 21 |
| Table S6. Single Variant Statistics for High Priority Candidate Addiction Genes. ....                                                      | 22 |

**Table S1.** Descriptive Statistics for Constituent Measures of Substance Use and Behavioral Disinhibition

| <b>Variable</b>                                                                 | <b>Mean (SD)</b>                      | <b>Range</b> | <b>% with 0</b>       |
|---------------------------------------------------------------------------------|---------------------------------------|--------------|-----------------------|
| <b><i>Nicotine Dependence</i></b>                                               |                                       |              |                       |
| Nicotine frequency<br>number of days per month                                  | 12.4 (13.7)<br>Exposed: 23.4 (11.2)   | 0 to 30      | 27.5                  |
| Nicotine quantity<br>number of uses per day                                     | 8.1 (13.5)<br>Exposed: 16.6 (15.6)    | 0 to 99      | 48.1                  |
| Nicotine dependence symptoms                                                    | 1.2 (1.9)<br>Exposed: 2.6 (2.1)       | 0 to 7       | 65.4<br>Exposed: 27.7 |
| <b><i>Alcohol Consumption</i></b>                                               |                                       |              |                       |
| Alcohol frequency<br>Likert scale from never (0) to 3x day (10)                 | 4.1 (2.5)<br>Exposed: 4.7 (2.1)       | 0 to 10      | 14.5                  |
| Number of lifetime intoxications                                                | 59.3 (190.0)<br>Exposed: 71.6 (206.7) | 0 to 999     | 29.5                  |
| Maximum consumption<br>greatest number of drinks in 24<br>hours                 | 9.4 (9.1)<br>Exposed: 11.2 (9.0)      | 0 to 50      | 14.6                  |
| <b><i>Alcohol Dependence</i></b>                                                |                                       |              |                       |
| Alcohol dependence<br>Social and occupational consequences                      | 0.7 (1.2)<br>Exposed: 0.9 (1.2)       | 0 to 9       | 56.6<br>Exposed: 48.8 |
| Alcohol dependence<br>Withdrawal and tolerance                                  | 0.3 (0.8)<br>Exposed: 0.4 (0.8)       | 0 to 4       | 81.8<br>Exposed: 79.0 |
| Alcohol dependence<br>Compulsive use and impairment in<br>major life activities | 0.5 (1.5)<br>Exposed: 0.6 (1.6)       | 0 to 13      | 80.5<br>Exposed: 78.4 |
| <b><i>Illicit Drug Use</i></b>                                                  |                                       |              |                       |
| Number of lifetime marijuana uses                                               | 74.9 (234.7)                          | 0 to 999     | 55.0                  |
| Number of different drug classes used                                           | 0.9 (1.5)                             | 0 to 11      | 54.2                  |
| Drug use disorder symptoms                                                      | 0.5 (1.5)                             | 0 to 9       | 81.9                  |
| <b><i>Behavioral Disinhibition</i></b>                                          |                                       |              |                       |
| Adult antisocial behavior symptoms                                              | 0.6 (1.0)                             | 0 to 7.5     | 64.0                  |

|                               |            |           |      |
|-------------------------------|------------|-----------|------|
| Conduct disorder symptoms     | 0.9 (1.4)  | 0 to 10.5 | 51.9 |
| Dissocial behaviors           | 0.4 (0.6)  | 0 to 3    | 63.1 |
| Delinquent Behavior Inventory | 3.3 (3.5)  | 0 to 21   | 21.8 |
| Aggressive undercontrol       | 41.5 (9.0) | 20 to 77  | N/A  |

---

All substance use and substance use disorder measures refer to period of heaviest use. Exposed refers to the means and standard deviations for the subsample of individuals who met the study criterion for adequate exposure (i.e., sufficient levels of use) to nicotine or alcohol. The number of lifetime intoxications and marijuana uses was capped at 999. The number of maximum drinks in 24 hours was capped at 50. The different drug classes included marijuana, amphetamines, barbiturates, cocaine, psychedelics, heroin, other opiates, inhalants, PCP, tranquilizers, and gas. Adult antisocial behavior refers to the adult criteria for antisocial personality disorder. Dissocial behaviors is the sum of the following behaviors: ever being suspended from school, ever being arrested, and early initiation of sexual intercourse (age 18 or older = 0, age 15-17 = 0.5, age 14 or younger = 1). The Delinquent Behavior Inventory is a self-report questionnaire of 21 different antisocial acts committed in childhood or adolescence. Aggressive undercontrol is a 20-item personality scale (1 to 4 response format). Items taken were the aggression, self-control (vs. impulsivity), harm avoidance (vs. thrill seeking), and traditionalism (vs. rebelliousness and nonconformity) scales of the Multidimensional Personality Questionnaire.

**Table S2.** Phenotypic Correlations for Family Member Pairs

| Family Pairing | NIC  |            | DRK |            | ALD |            | DRG |            | BD  |            | NICe |            | DRKe |            | ALDe |            |
|----------------|------|------------|-----|------------|-----|------------|-----|------------|-----|------------|------|------------|------|------------|------|------------|
|                | r    | 95% CI     | r   | 95% CI     | r   | 95% CI     | r   | 95% CI     | r   | 95% CI     | r    | 95% CI     | r    | 95% CI     | r    | 95% CI     |
|                |      | Lo Hi      |     | Lo Hi      |     | Lo Hi      |     | Lo Hi      |     | Lo Hi      |      | Lo Hi      |      | Lo Hi      |      | Lo Hi      |
| MZ Twins       | .71  | (.68 .74)  | .72 | (.69 .75)  | .75 | (.73 .78)  | .74 | (.71 .76)  | .74 | (.72 .77)  | .70  | (.64 .74)  | .69  | (.65 .72)  | .70  | (.66 .74)  |
| DZ/Bio Sibs    | .44  | (.38 .50)  | .46 | (.39 .51)  | .41 | (.34 .47)  | .46 | (.40 .51)  | .43 | (.37 .49)  | .51  | (.41 .60)  | .45  | (.37 .52)  | .31  | (.22 .39)  |
| Adoptive Sibs* | -.02 | (-.31 .29) | .21 | (-.17 .50) | .20 | (-.05 .41) | .10 | (-.14 .33) | .31 | (.01 .54)  | .19  | (-.51 .62) | .21  | (-.18 .51) | .28  | (.01 .50)  |
| Mom/Bio        | .22  | (.18 .26)  | .23 | (.19 .27)  | .25 | (.20 .29)  | .27 | (.23 .31)  | .30 | (.26 .34)  | .14  | (.05 .22)  | .14  | (.09 .20)  | .19  | (.14 .25)  |
| Mom/Adopt*     | .31  | (-.02 .52) | .19 | (-.10 .41) | .29 | (.07 .47)  | .18 | (.00 .35)  | .19 | (-.18 .45) | -.07 | (-.41 .31) | .39  | (.07 .57)  | .42  | (.16 .59)  |
| Dad/Bio        | .23  | (.18 .27)  | .23 | (.18 .27)  | .23 | (.18 .27)  | .26 | (.21 .30)  | .31 | (.27 .35)  | .20  | (.11 .28)  | .15  | (.09 .20)  | .19  | (.14 .25)  |
| Dad/Adopt*     | .20  | (-.04 .40) | .19 | (-.13 .43) | .12 | (-.09 .31) | .08 | (-.13 .27) | .20 | (-.12 .44) | .15  | (-.34 .45) | .16  | (-.09 .37) | .14  | (-.08 .33) |
| Mom/Dad        | .34  | (.30 .38)  | .40 | (.36 .44)  | .37 | (.32 .41)  | .56 | (.53 .59)  | .38 | (.34 .42)  | .20  | (.10 .29)  | .32  | (.27 .37)  | .32  | (.26 .36)  |

ALD, alcohol dependence; BD, behavioral disinhibition; Bio sibs, biological siblings; CI, confidence interval; DRG, illicit drug use; DRK, alcohol consumption; DZ, dizygotic; MZ, monozygotic; NIC, nicotine dependence.

NICe = nicotine dependence among exposed individuals, and similarly for DRKe and ALDe.

Mom/Bio is correlation between mother and biological offspring; Dad/Bio correlation between father and biological offspring; Mom/Adopt and Dad/Adopt are analogous for adoptive offspring.

\*These comparisons are based on few observations and have large confidence intervals.

**Table S3.** Correlations Among Residualized Phenotypes

|                               | <b>Nicotine</b> | <b>Alcohol Consumption</b> | <b>Alcohol Dependence</b> | <b>Illicit Drugs</b> | <b>Behavioral Disinhibition</b> | <b>Nicotine (Exposed)</b> | <b>Alcohol Consumption (Exposed)</b> | <b>Alcohol Dependence (Exposed)</b> |
|-------------------------------|-----------------|----------------------------|---------------------------|----------------------|---------------------------------|---------------------------|--------------------------------------|-------------------------------------|
| Nicotine                      | 1.0             |                            |                           |                      |                                 |                           |                                      |                                     |
| Alcohol Consumption           | .49             | 1.0                        |                           |                      |                                 |                           |                                      |                                     |
| Alcohol Dependence            | .60             | .64                        | 1.0                       |                      |                                 |                           |                                      |                                     |
| Illicit Drugs                 | .51             | .48                        | .64                       | 1.0                  |                                 |                           |                                      |                                     |
| Behavioral Disinhibition      | .57             | .66                        | .72                       | .64                  | 1.0                             |                           |                                      |                                     |
| Nicotine (Exposed)            | .90             | .45                        | .43                       | .38                  | .51                             | 1.0                       |                                      |                                     |
| Alcohol Consumption (Exposed) | .49             | .94                        | .66                       | .45                  | .64                             | .52                       | 1.0                                  |                                     |
| Alcohol Dependence (Exposed)  | .56             | .59                        | .99                       | .59                  | .72                             | .44                       | .68                                  | 1.0                                 |

**Table S4.** Covariates Significant in the Covariate Correction

|                                     | Age | Age <sup>2</sup> | BYR | Generation | Sex | BYR<br>×<br>Generation | Generation<br>×<br>Sex | Age<br>×<br>Generation | PCs<br>1-10 | R <sup>2</sup> |
|-------------------------------------|-----|------------------|-----|------------|-----|------------------------|------------------------|------------------------|-------------|----------------|
| Nicotine                            | x   | x                |     | x          |     | x                      | x                      | x                      |             | .12            |
| Alcohol<br>Consumption              | x   | x                | x   | x          |     | x                      | x                      | x                      |             | .27            |
| Alcohol<br>Dependence               | x   | x                | x   | x          | x   | x                      | x                      | x                      | 1,8         | .23            |
| Illicit Drugs                       | x   |                  | x   | x          |     | x                      | x                      | x                      | 4           | .14            |
| Behavioral<br>Disinhibition         | x   | x                |     | x          | x   | x                      | x                      | x                      | 7           | .18            |
| Nicotine<br>(Exposed)               | x   |                  | x   | x          |     | x                      |                        | x                      | 1,4,7       | .39            |
| Alcohol<br>Consumption<br>(Exposed) | x   | x                | x   | x          | x   | x                      | x                      | x                      | 1           | .30            |
| Alcohol<br>Dependence<br>(Exposed)  | x   | x                | x   | x          | x   |                        | x                      | x                      | 1,8         | .21            |

BYR, birth year; PC, principal components.

Covariate correction was done with multiple regression. An “x” denotes that the covariate was significantly associated with the phenotype. The PCs 1-10 column denotes the PC (if any) that was significantly associated with that phenotype. PC associations were not strongly associated in any case. R<sup>2</sup> is the adjusted r-squared for the full model containing all covariates, regardless of significance.

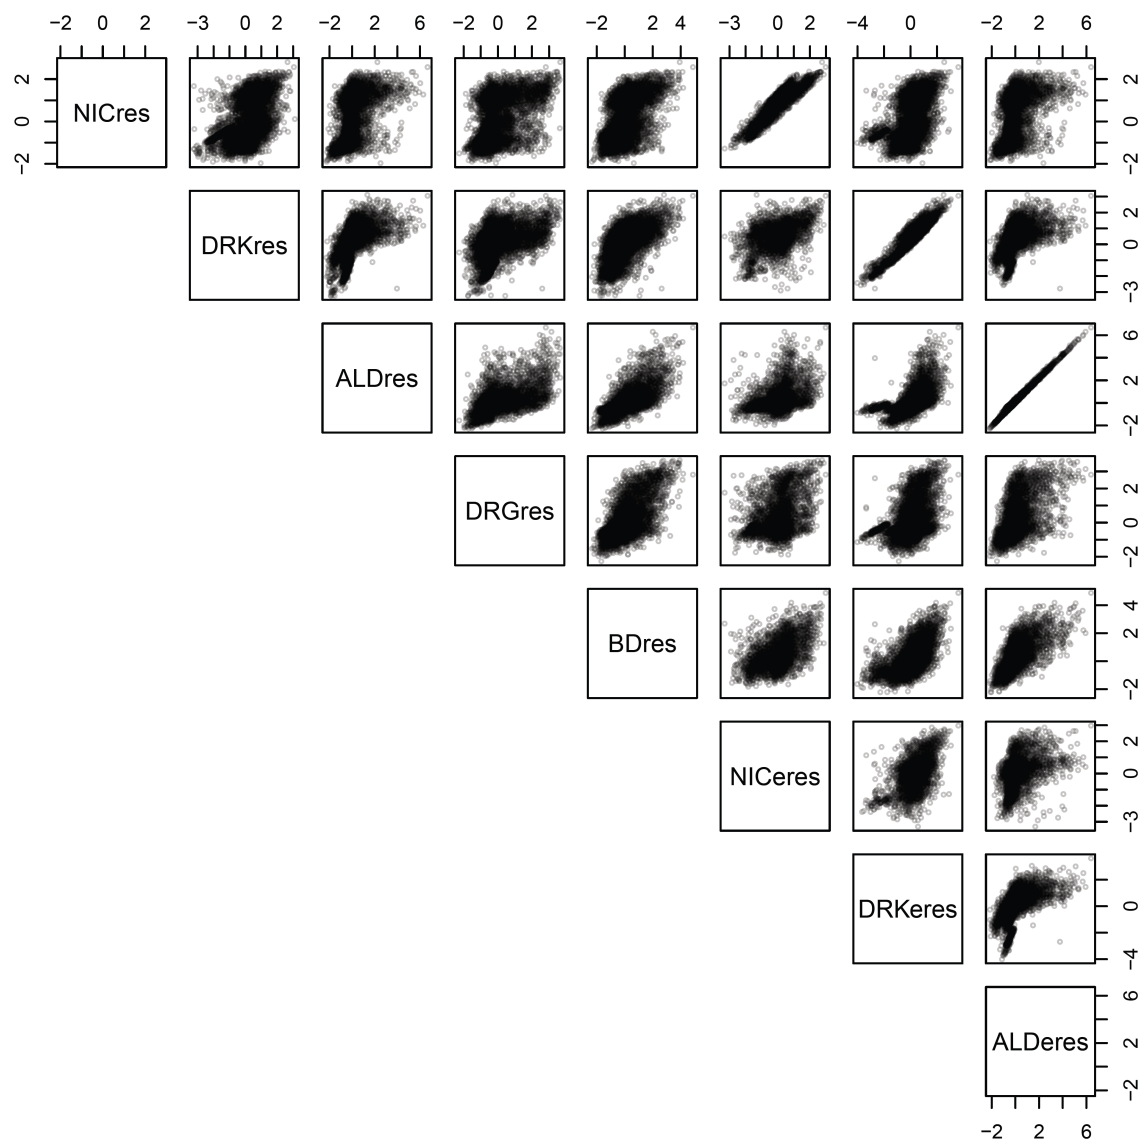

**Figure S1.** Phenotypic Scatterplot Prior to Inverse Normalization. NICres, DRKres, ALDres, DRGres, and BDres are the residuals calculated for the nicotine, alcohol consumption, alcohol dependence, drug use, and behavioral disinhibition phenotypes, respectively. NICeres, DRKeres, and ALDeres are the phenotypes conditioned on exposure to the relevant substance. The clumps observed for DRKeres are due to individuals who had been sufficiently exposed to alcohol but do not currently drink. That is, their phenotypic value was zero, but the zero value was perturbed in covariate correction, leading to a “clump” in the scatterplots.

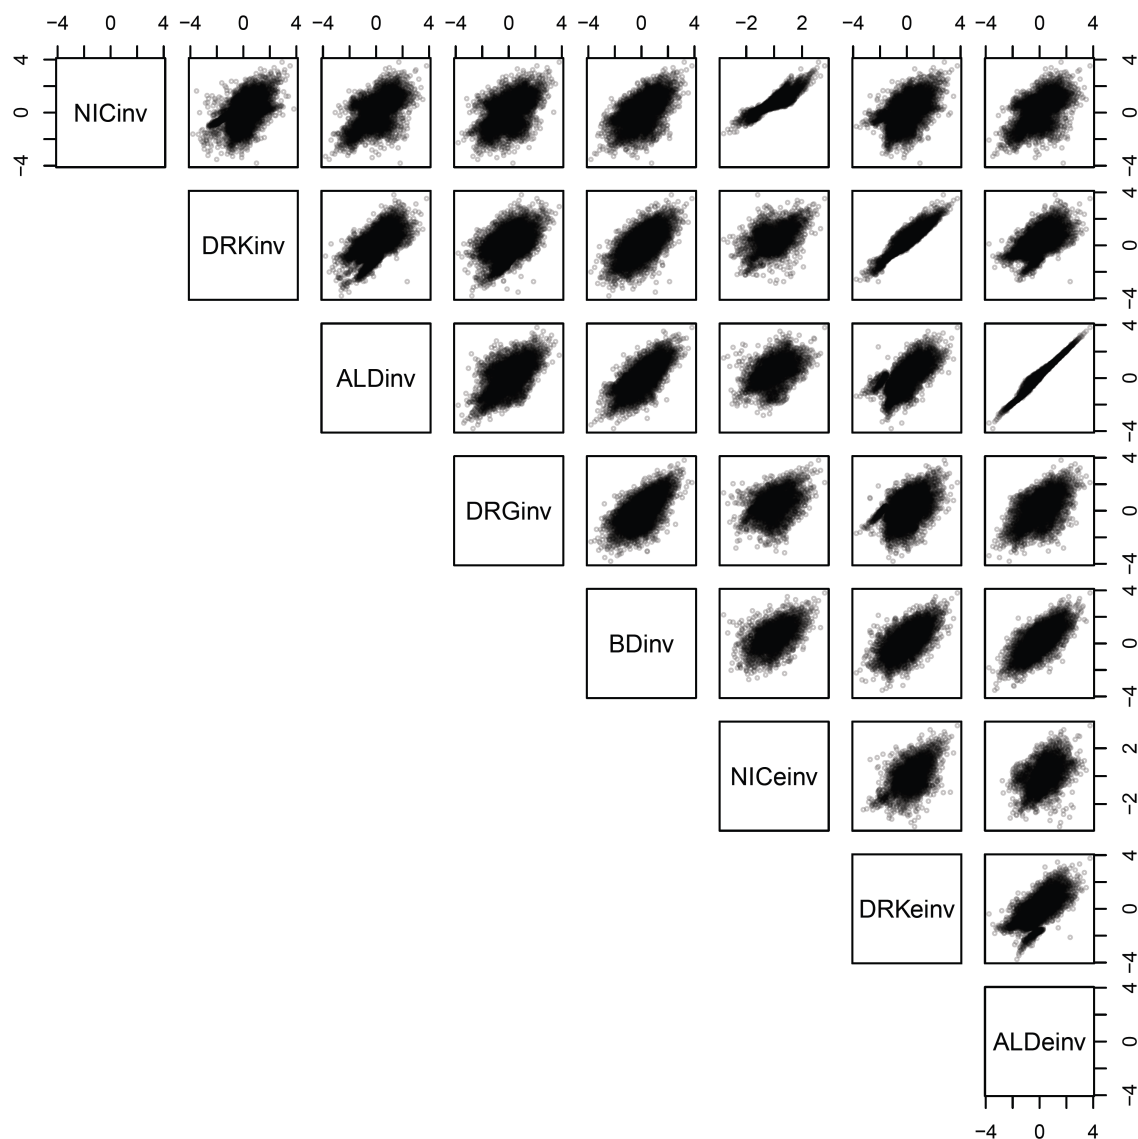

**Figure S2.** Phenotypic Scatterplot after Inverse Normalization. NICinv, DRKinv, ALDinv, DRGinv, and BDinv are the residuals calculated for the nicotine, alcohol consumption, alcohol dependence, drug use, and behavioral disinhibition phenotypes, respectively. NICEinv, DRKeinv, and ALDeinv are the phenotypes conditioned on exposure to the relevant substance. The clumps observed for DRKeinv are due to individuals who had been sufficiently exposed to alcohol but do not currently drink. That is, their phenotypic value was zero, but the zero value was perturbed in covariate correction, leading to a “clump” in the scatterplots.



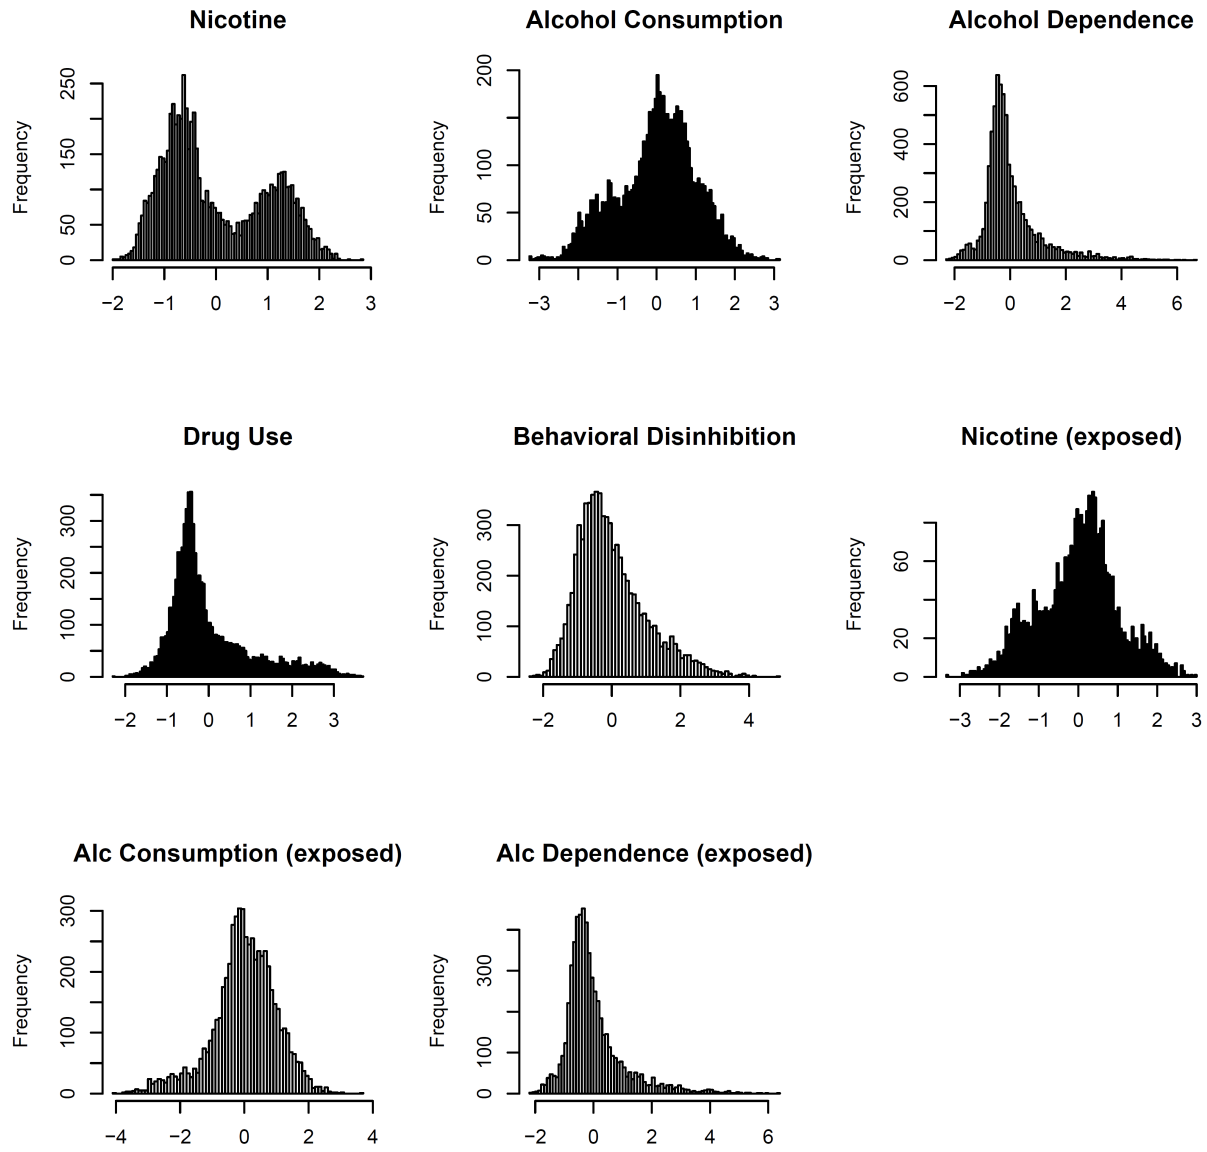

**Figure S3.** Phenotype Histograms after Covariate Correction, Prior to Inverse Normalization. Alc, alcohol.

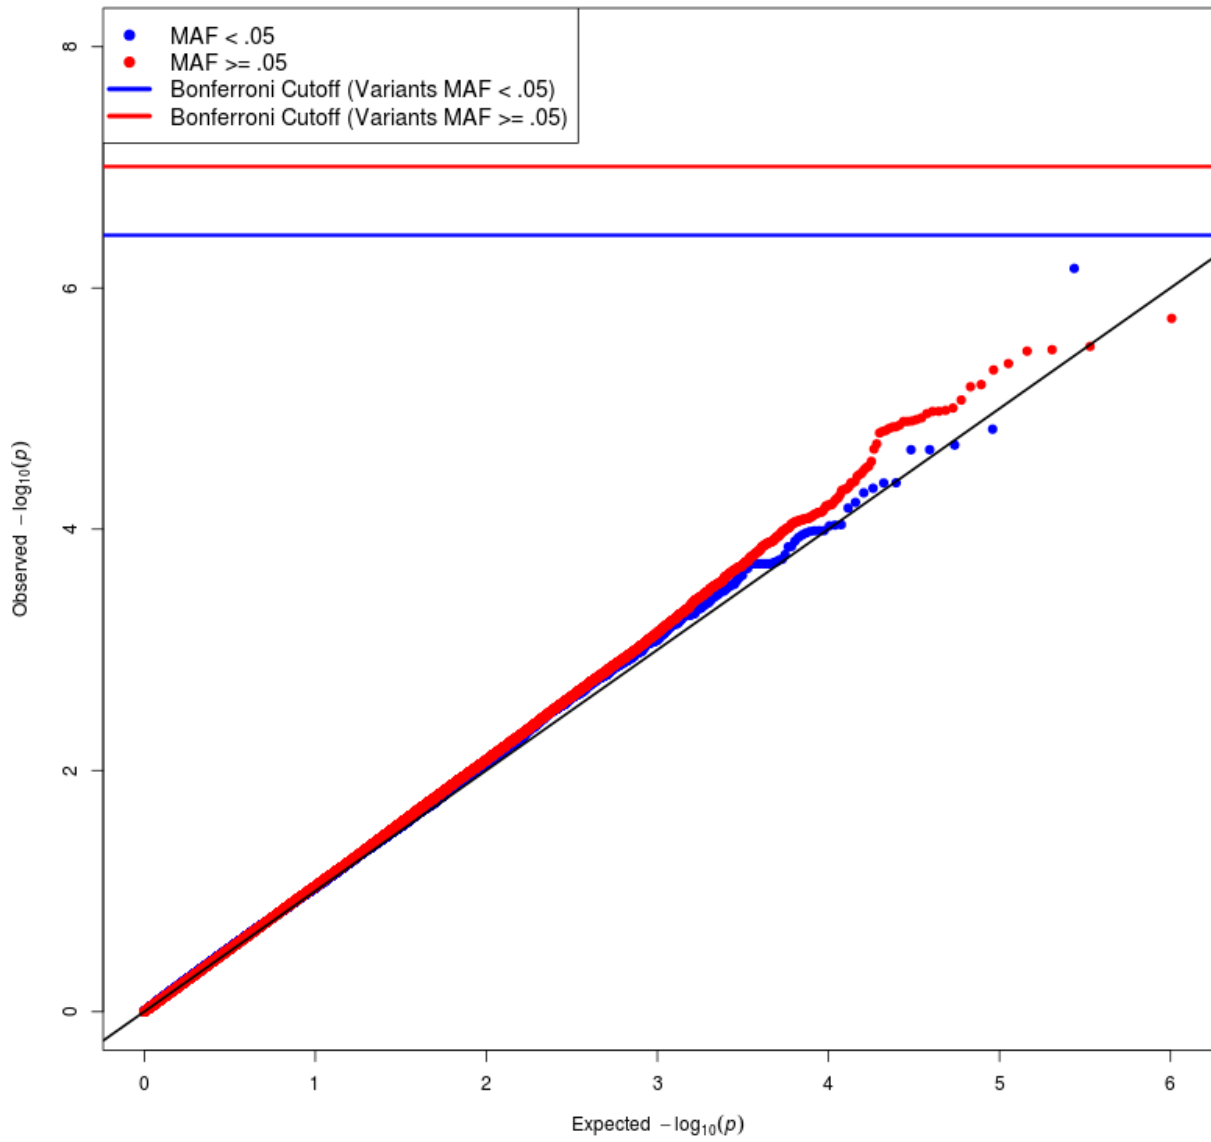

**Figure S4.** Single Variant QQplot of Nicotine. MAF, minor allele frequency.

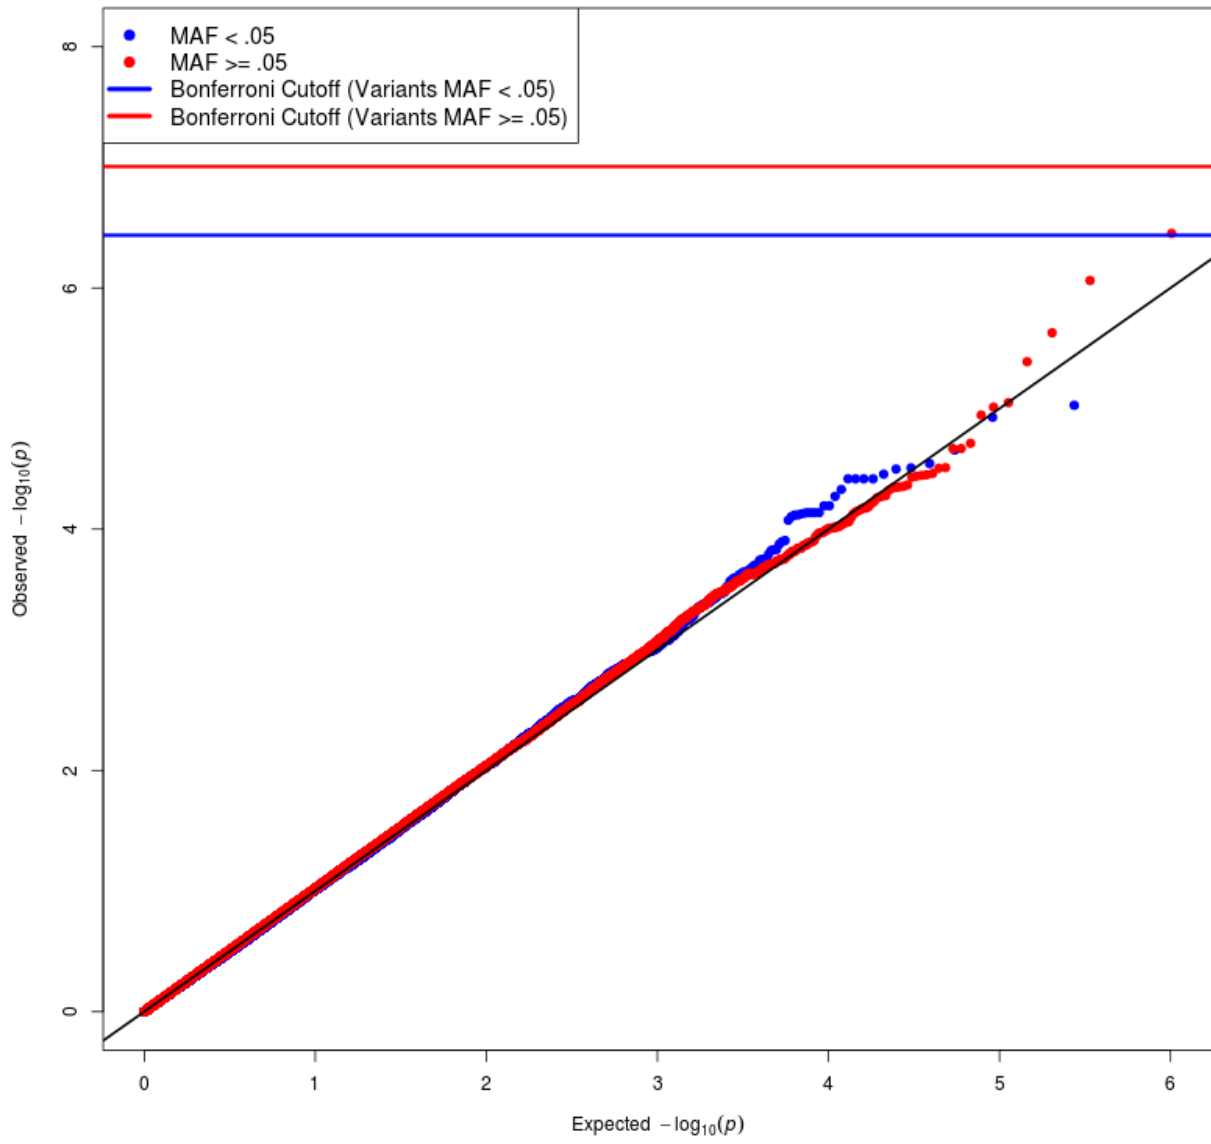

**Figure S5.** Single Variant QQplot of Alcohol Consumption. MAF, minor allele frequency.

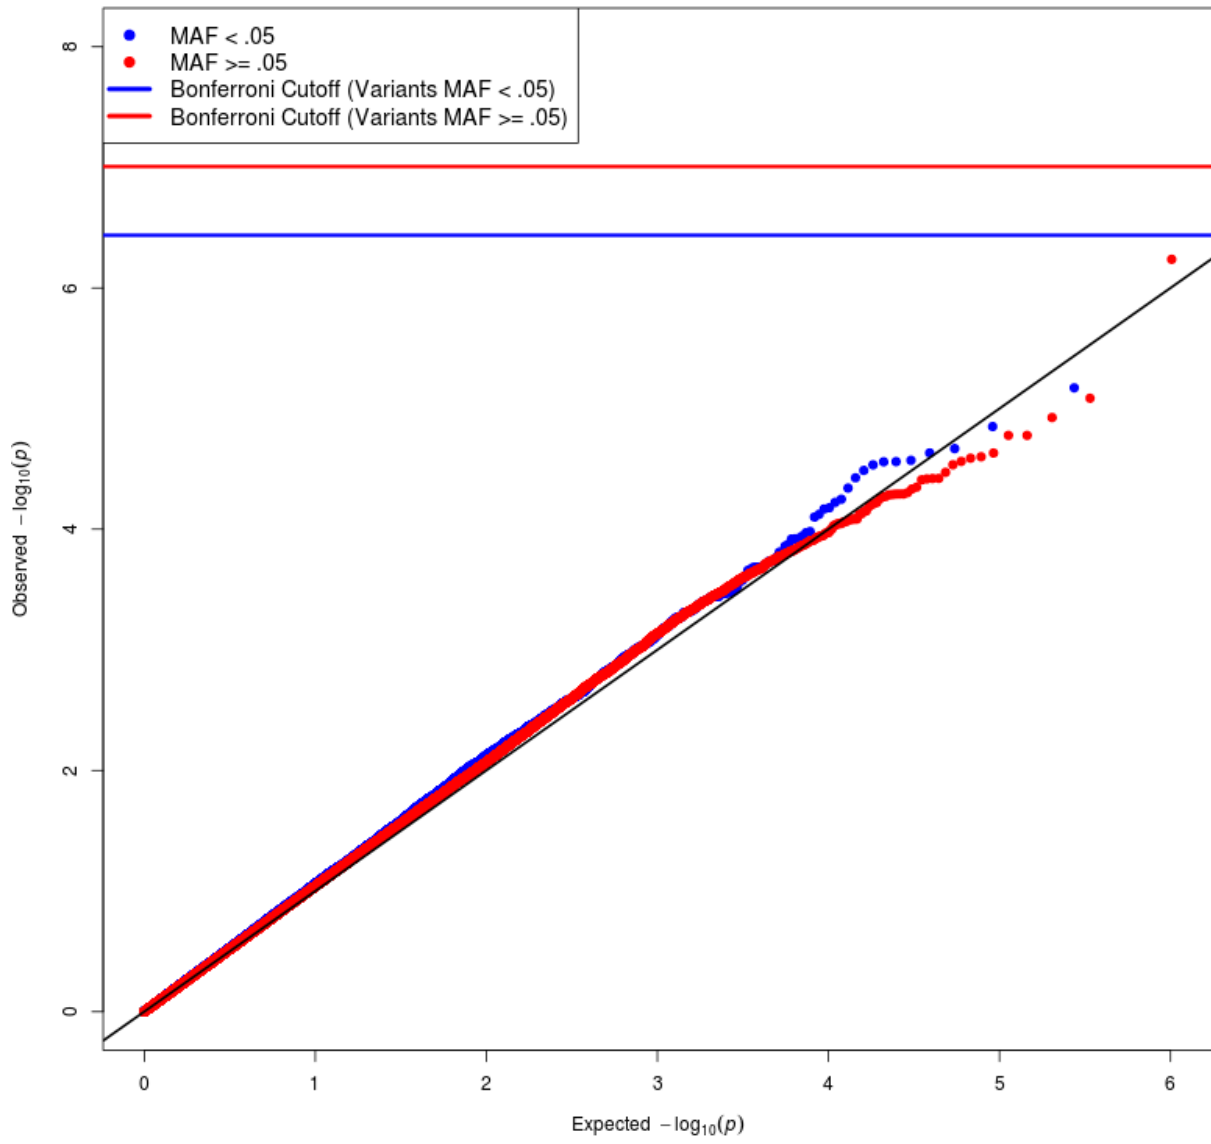

**Figure S6.** Single Variant QQplot of Alcohol Dependence. MAF, minor allele frequency.

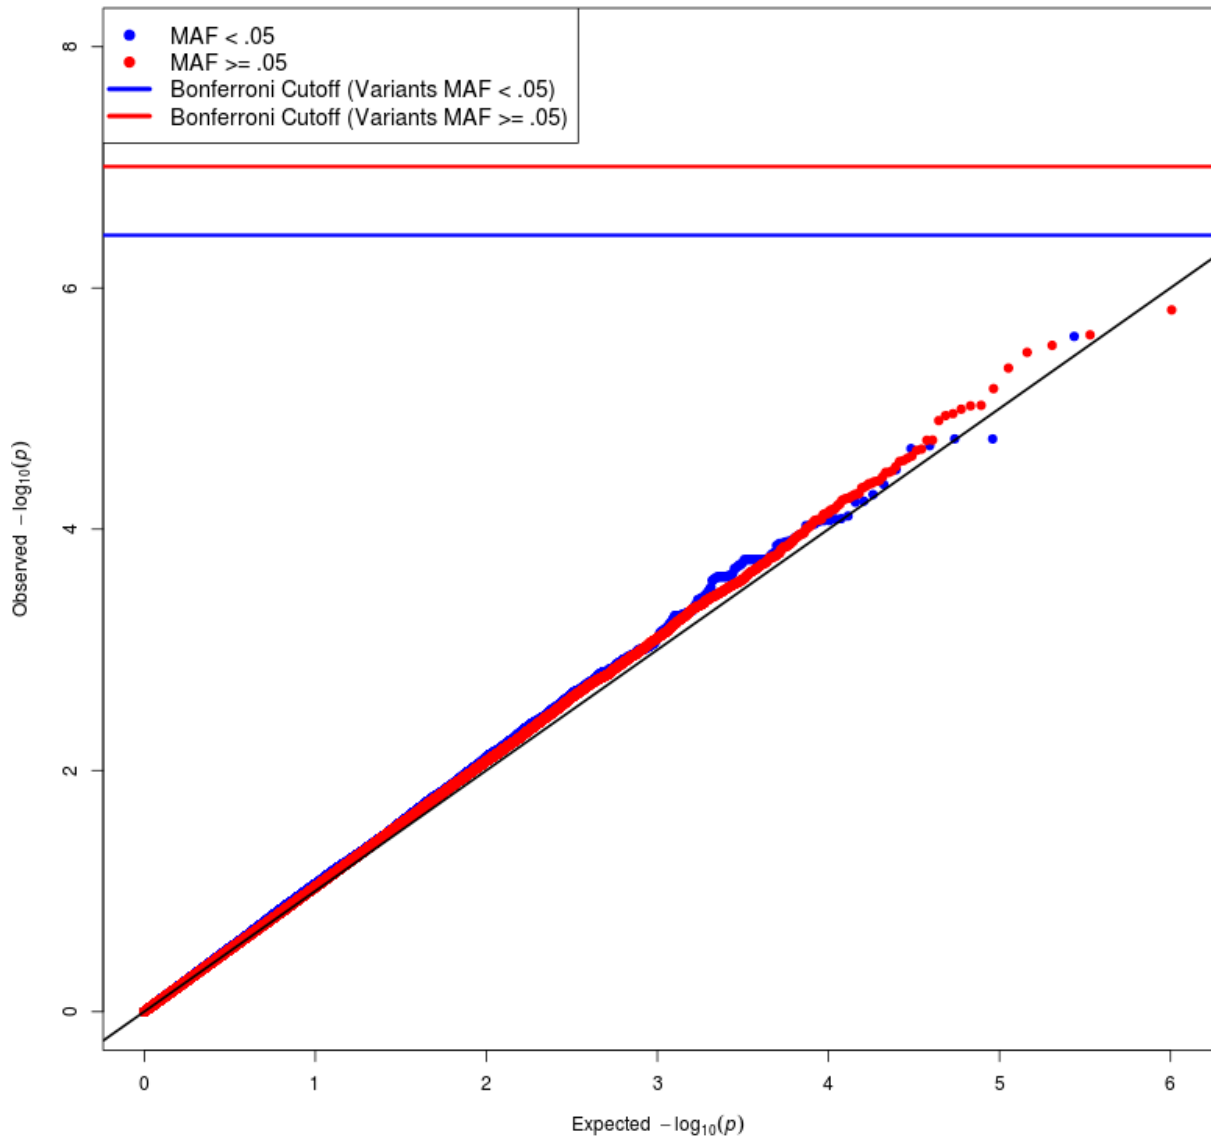

**Figure S7.** Single Variant QQplot of Illicit Drug Use. MAF, minor allele frequency.

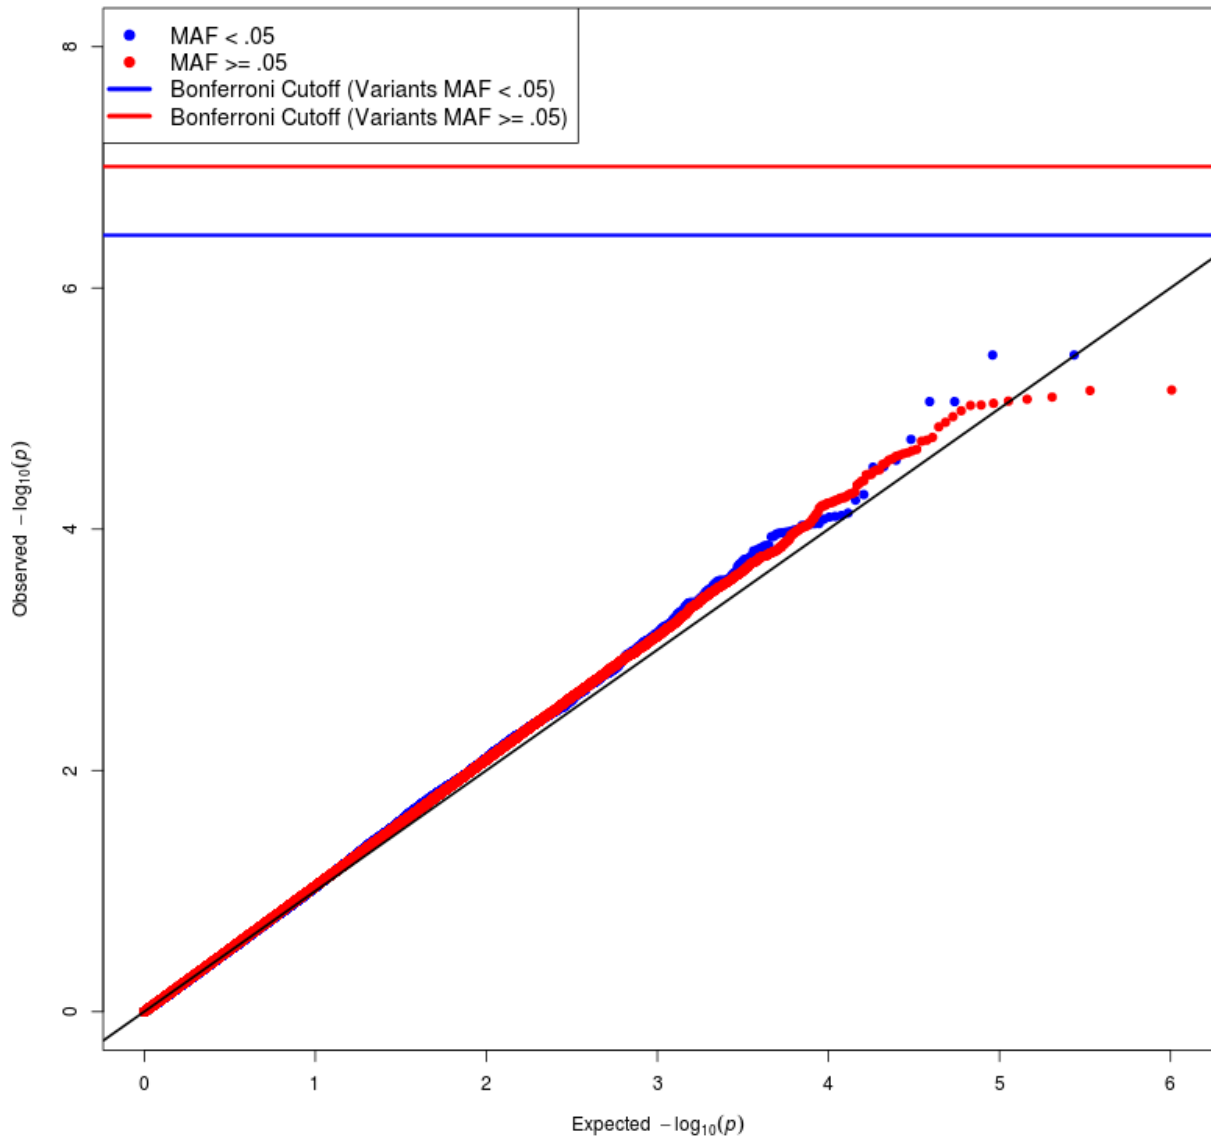

**Figure S8.** Single Variant QQplot of Behavioral Disinhibition. MAF, minor allele frequency.

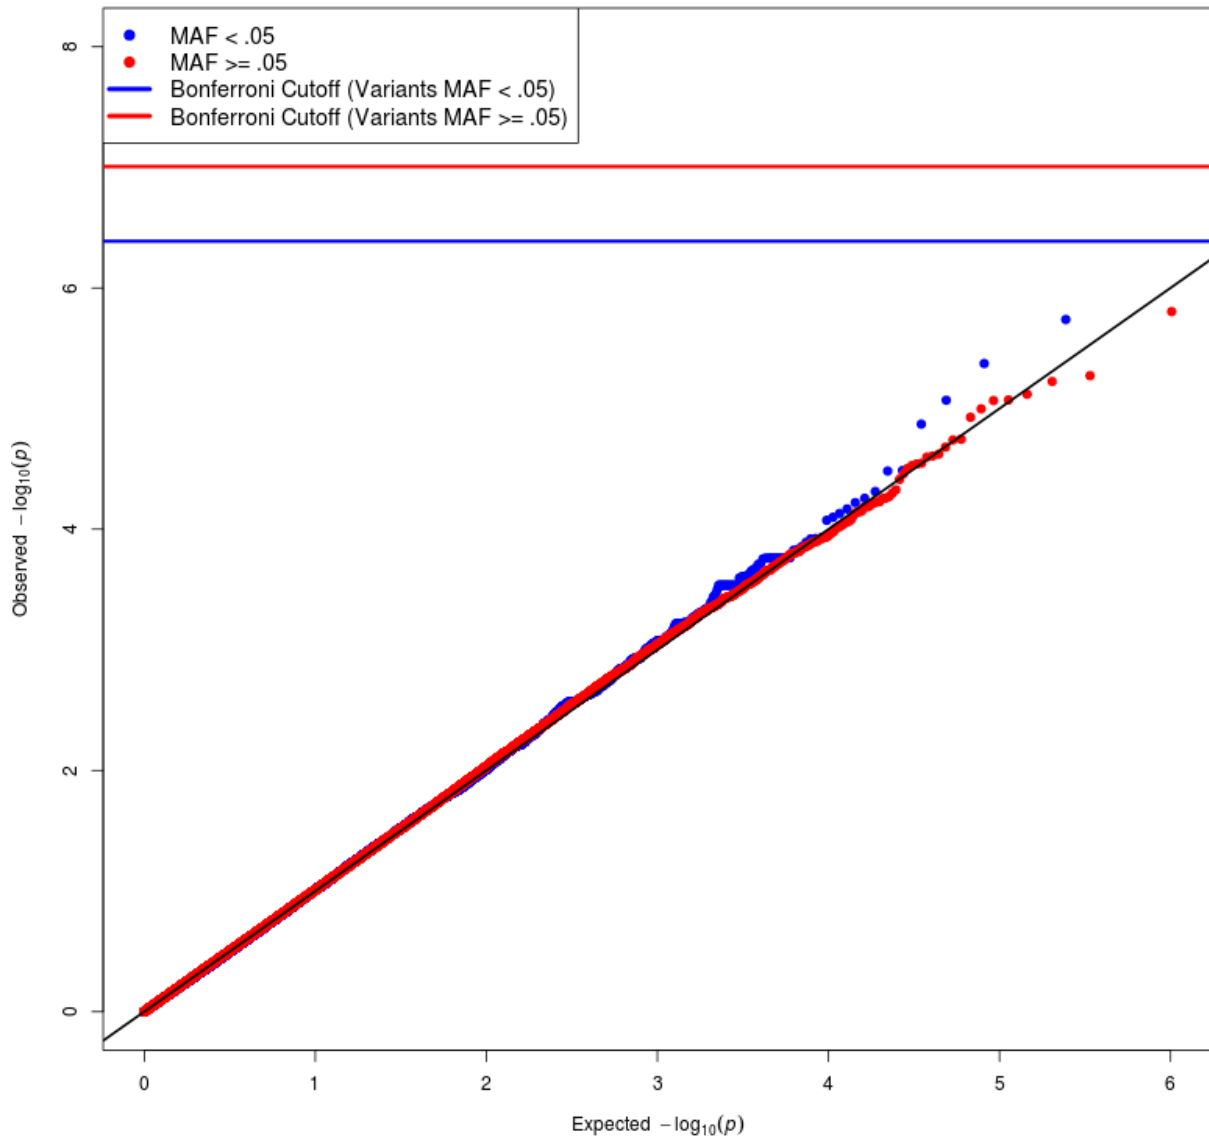

**Figure S9.** Single Variant QQplot of Nicotine in Individuals Exposed to Nicotine. MAF, minor allele frequency.

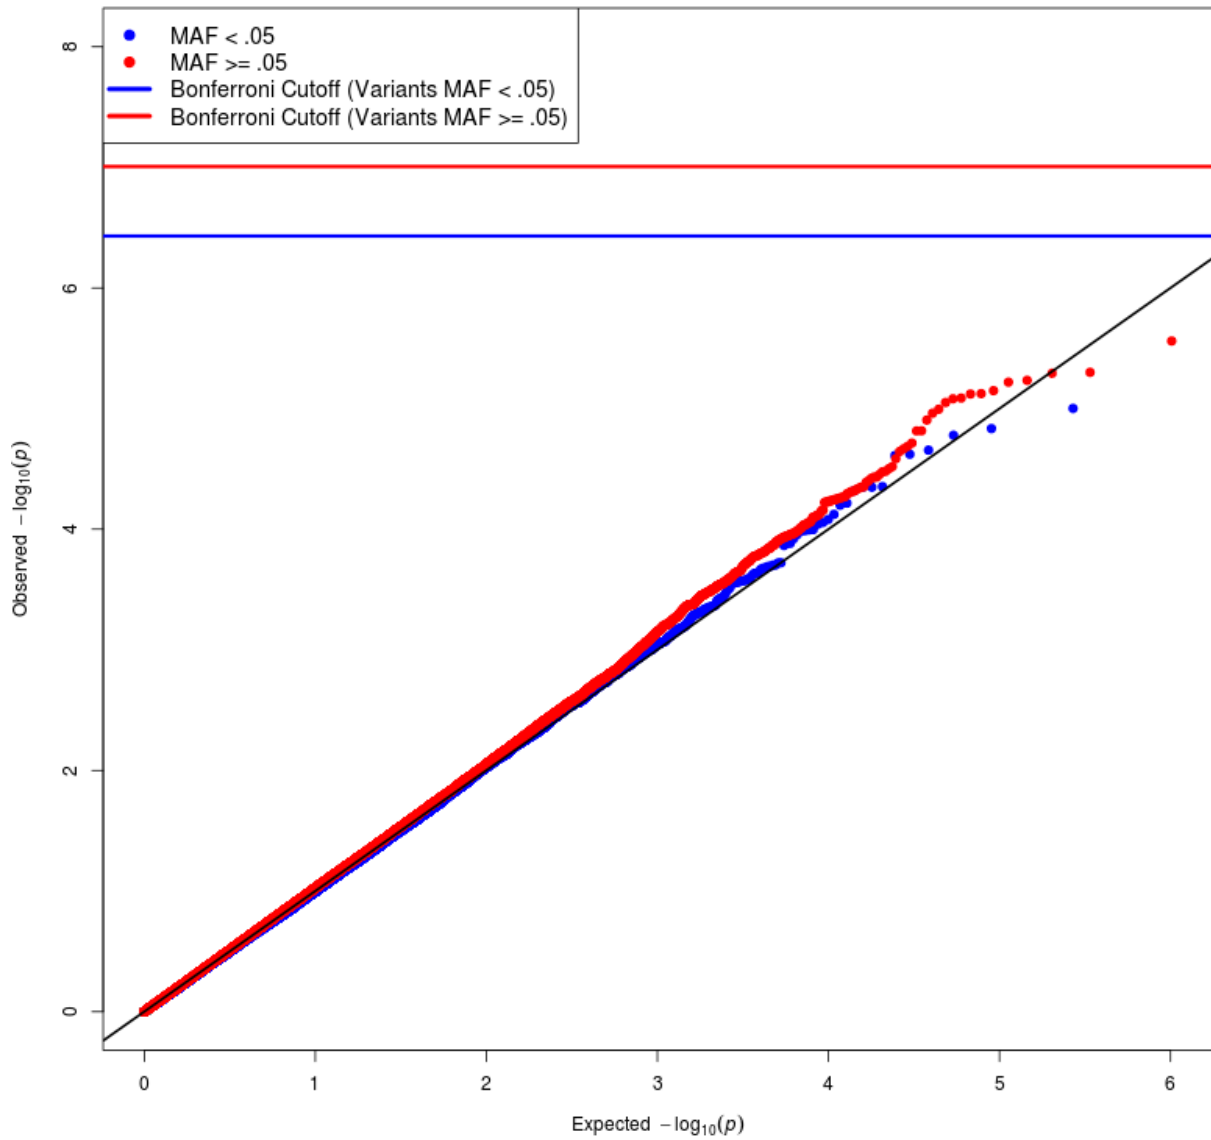

**Figure S10.** Single Variant QQplot of Alcohol Consumption in Individuals Exposed to Alcohol. MAF, minor allele frequency.



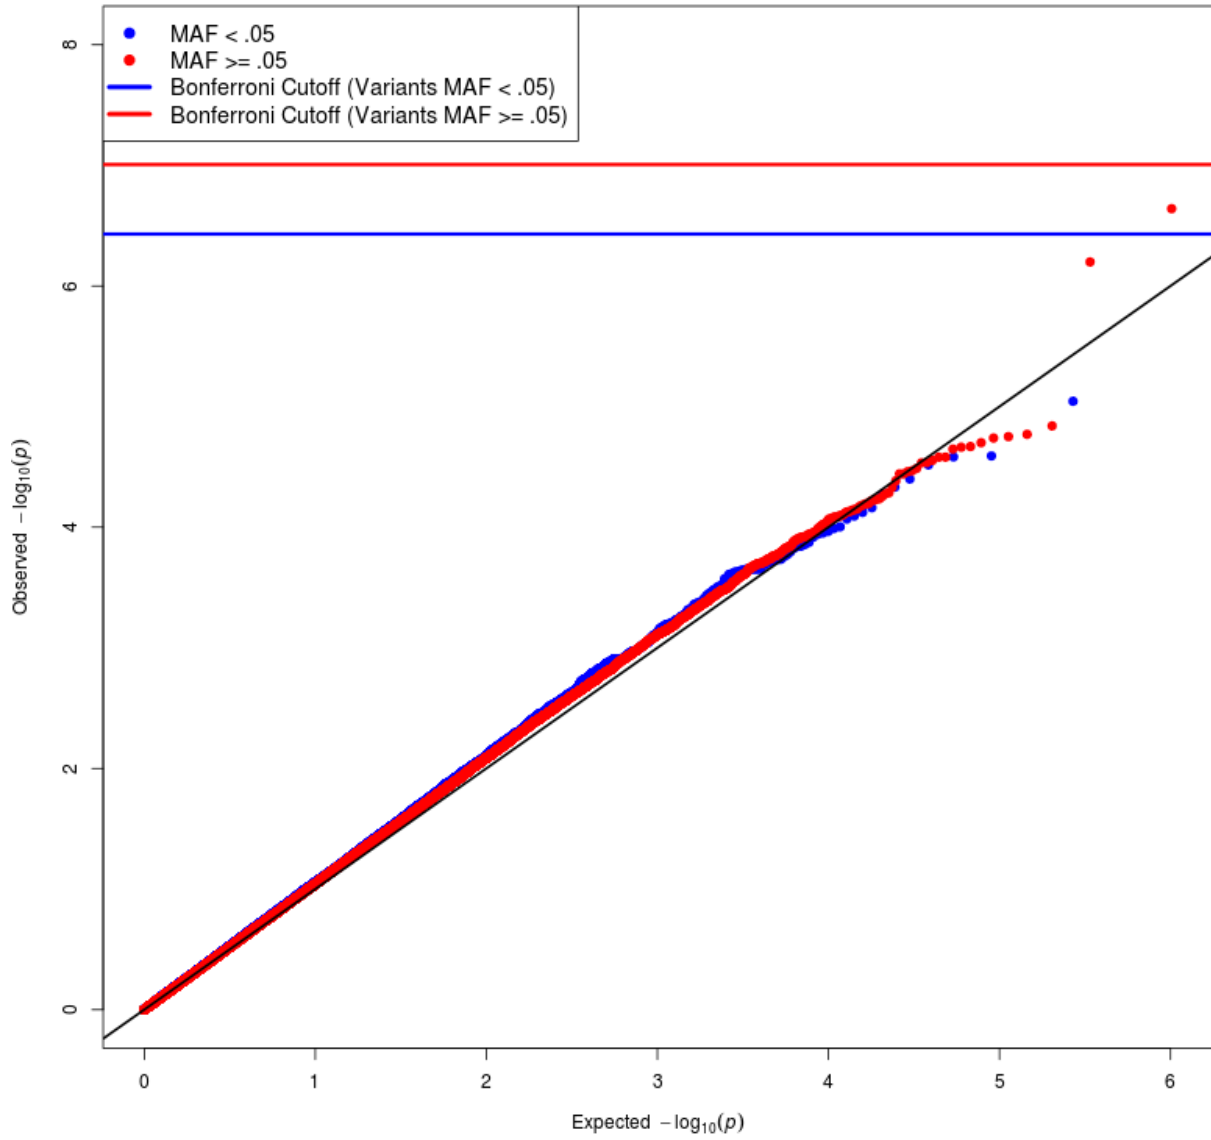

**Figure S11.** Single Variant QQplot of Alcohol Dependence in Individuals Exposed to Alcohol. MAF, minor allele frequency.

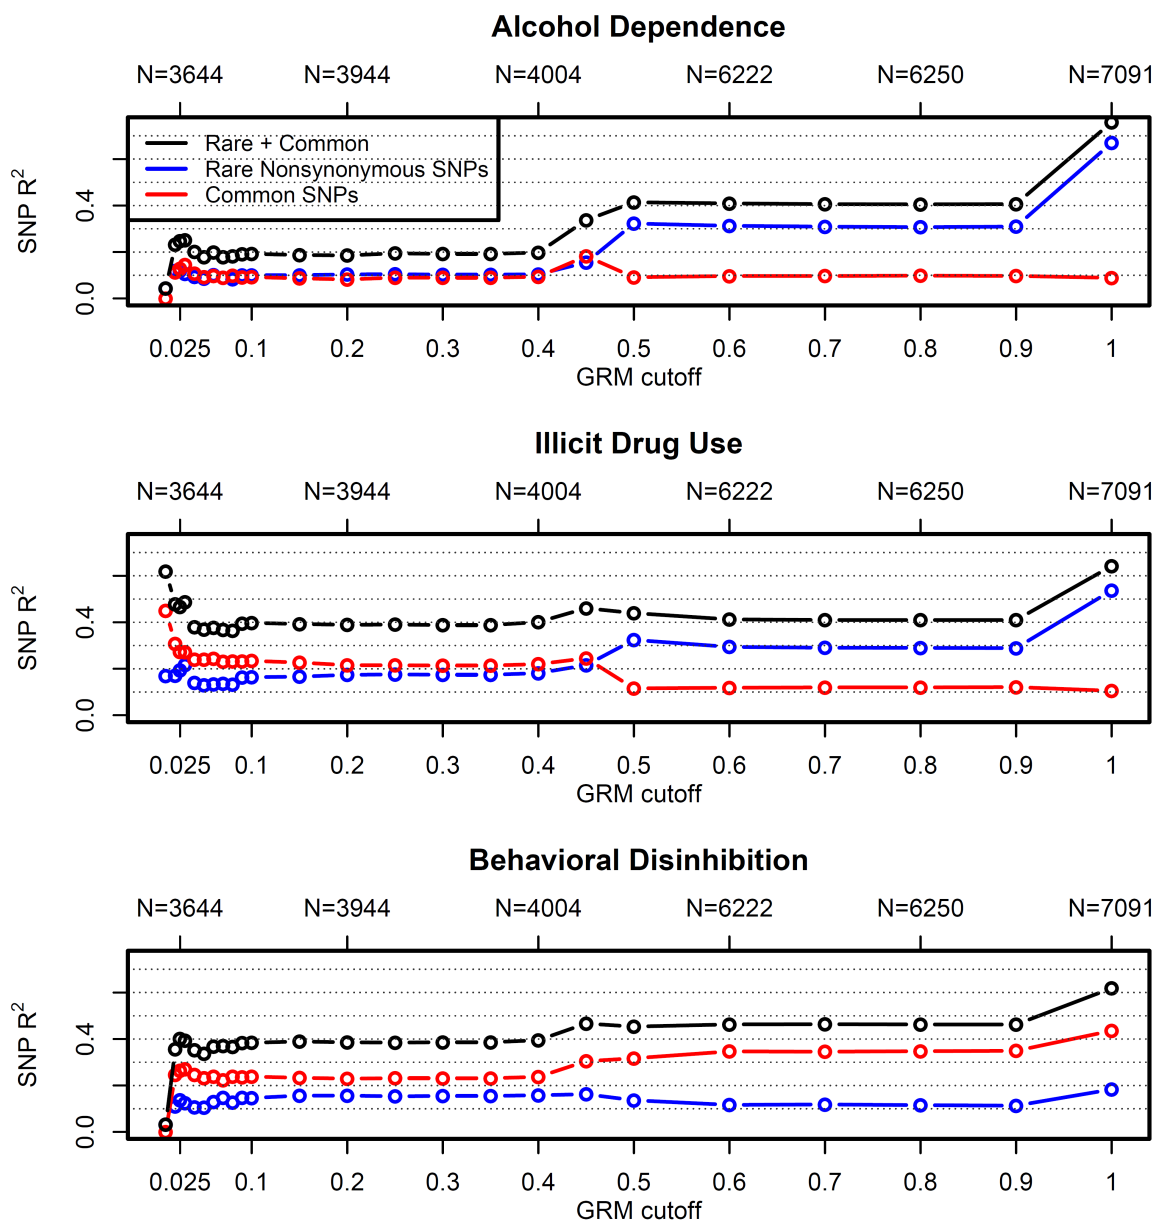

**Figure S12.** SNP-based Heritability as a Function of GRM Cutoff for Alcohol Dependence, Illicit Drug Use, and Behavioral Disinhibition. Note the x-axis is GRM cutoff, which is a measure of relatedness calculated from SNPs, similar to identity by state. A cutoff greater than .025 is typically not recommended for estimates of SNP-based heritability. In our family sample, cutoffs greater than .4 begin including first-degree relatives, such as siblings along with parents. At very high cutoffs such as 1 (i.e., no cutoff) the entire sample is included, including the monozygotic twin pairs. At high cutoffs the familial relatedness is being captured by the SNPs, such that the two independent sets of SNPs (rare and common) become proxies for known familial relationships, and are essentially redundant in accounting for familial relationships in the phenotype. This explains why the rare SNPs become prominent for high GRM cutoffs in alcohol dependence and illicit drug use, but not for behavioral disinhibition. GRM, genetic relationship matrix; SNP, single nucleotide polymorphism.

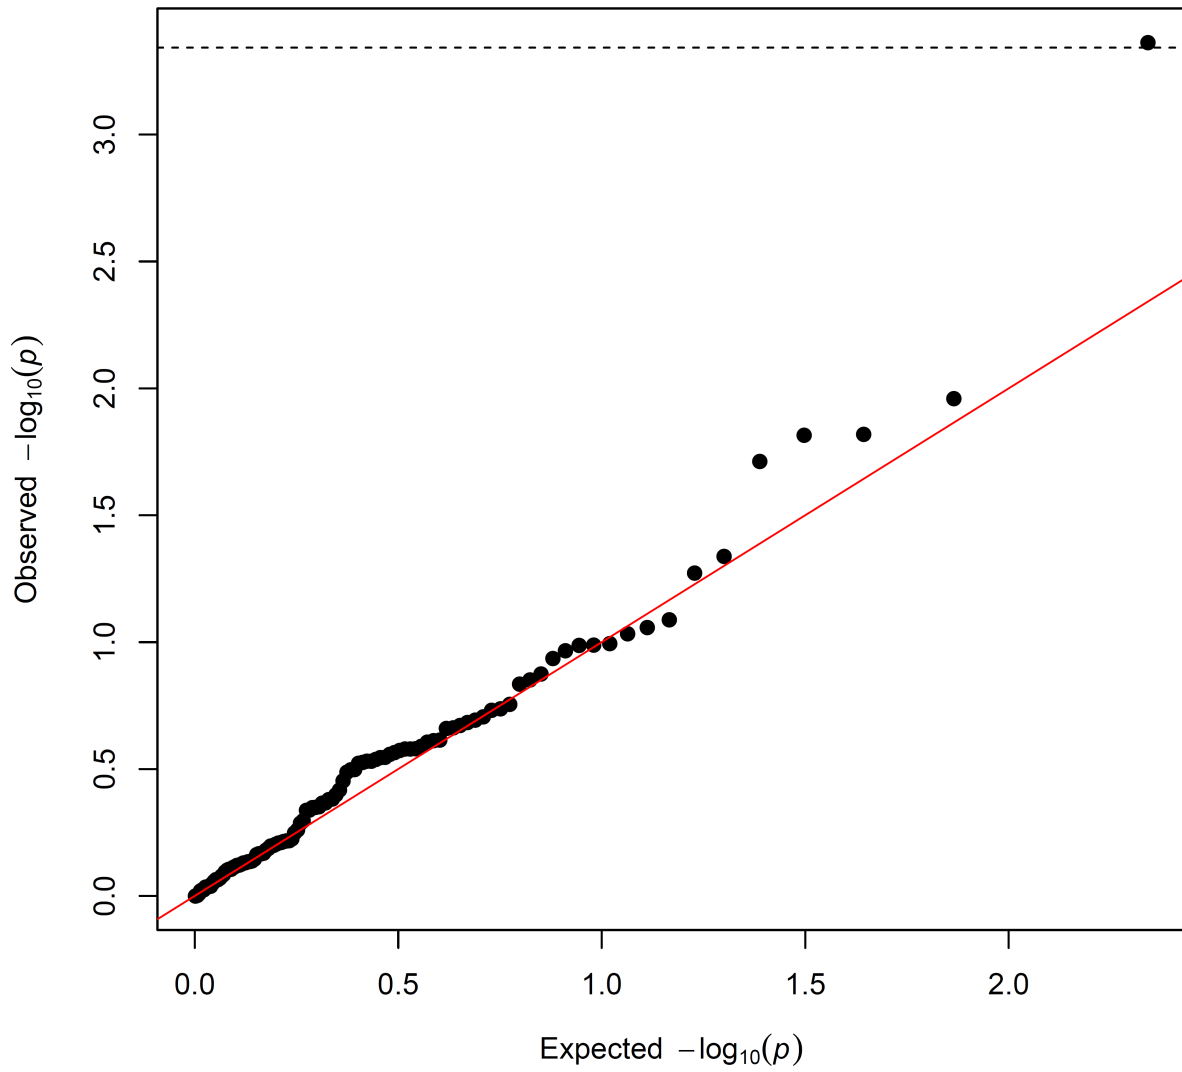

**Figure S13.** Nonsynonymous Variants in Genes Associated with Smoking/Drinking by GWAS Meta-Analysis. Dotted line is Bonferroni cutoff for 116 tests. The significant variant is 9:136521726 in *DBH*.

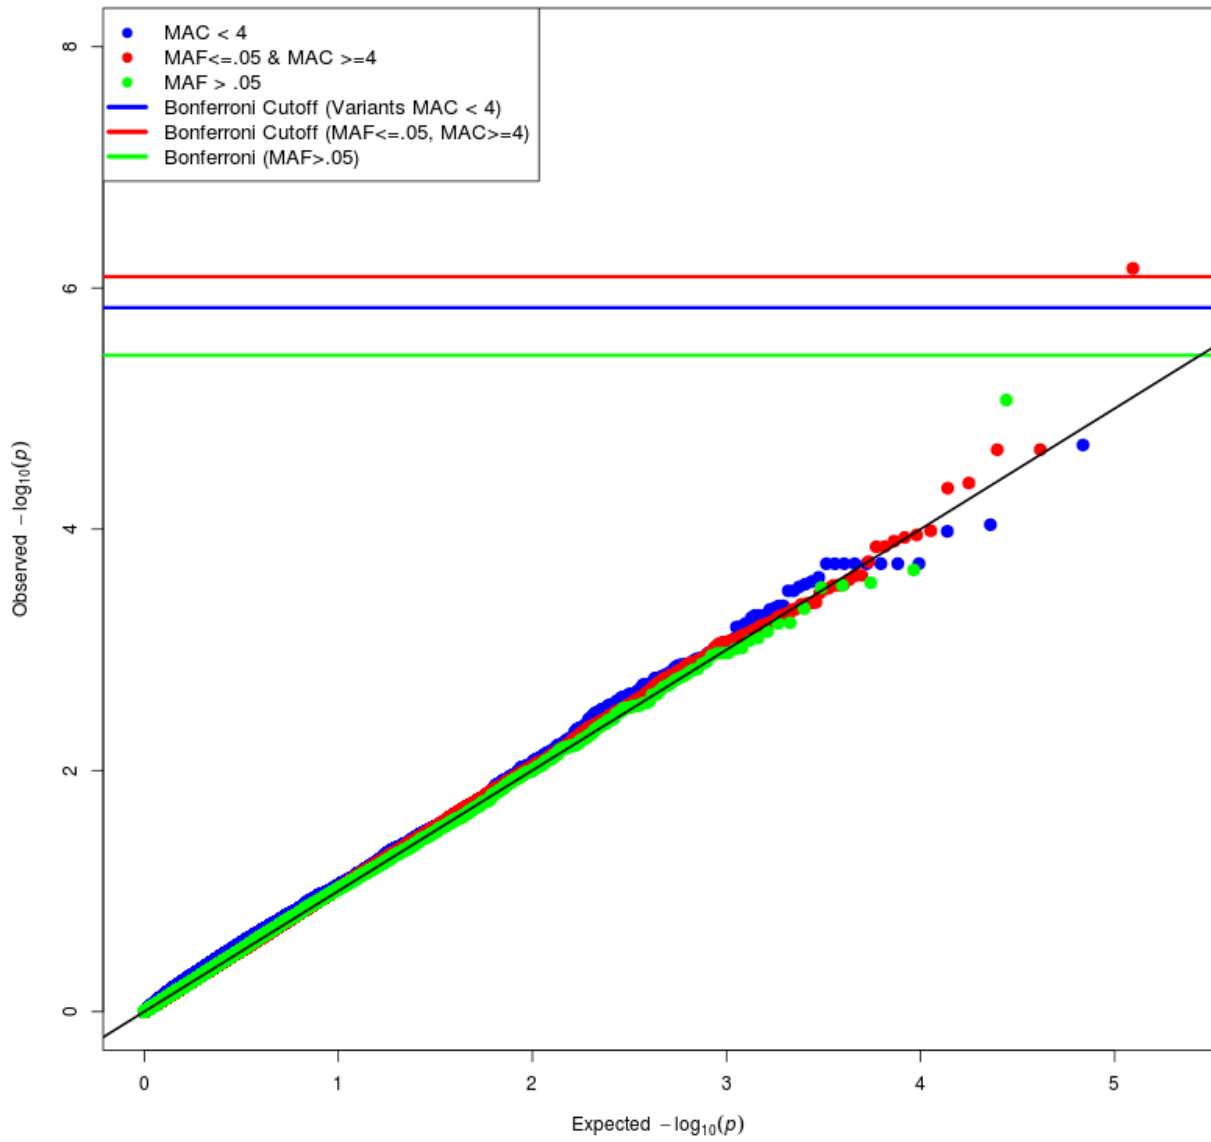

**Figure S14.** Single Variant QQplot of Nicotine, Considering Only Nonsynonymous Variants. MAC, minor allele count; MAF, minor allele frequency.

**Table S5.** Summary of Burden Tests for 151 Candidate Addiction Genes

See Supplement 2 (Excel file) for Table S5.

**Table S6.** Single Variant Statistics for High Priority Candidate Addiction Genes.

| Gene          | Phenotype          | CHR | BP        | MAF     | MAC  | Ref | Alt | Alt Eff Size | p-value |
|---------------|--------------------|-----|-----------|---------|------|-----|-----|--------------|---------|
| <i>CHRNA5</i> | Nicotine (Exposed) | 15  | 78873272  | 0.00026 | 1    | T   | G   | -0.089       | 0.9138  |
|               |                    |     | 78880752  | 0.01431 | 98   | G   | A   | 0.211        | 0.0458  |
|               |                    |     | 78882446  | 0.00052 | 5    | C   | T   | 0.557        | 0.2841  |
|               |                    |     | 78882726  | 0.00026 | 2    | C   | T   | -0.136       | 0.8623  |
|               |                    |     | 78882821  | 0.00026 | 2    | T   | A   | 0.611        | 0.4288  |
|               |                    |     | 78882925  | 0.34079 | 2432 | G   | A   | 0.064        | 0.0151  |
|               |                    |     | 78885574  | 0.00026 | 3    | T   | A   | 0.200        | 0.7839  |
| <i>CHRNA3</i> | Nicotine (Exposed) | 15  | 78885574  | 0.00026 | 3    | T   | A   | 0.200        | 0.7839  |
|               |                    |     | 78893741  | 0.00026 | 1    | A   | C   | 1.109        | 0.2631  |
|               |                    |     | 78894335  | 0.00130 | 7    | G   | A   | -0.316       | 0.4165  |
|               |                    |     | 78909414  | 0.00026 | 1    | C   | T   | 0.247        | 0.7643  |
|               |                    |     | 78911230  | 0.04865 | 344  | C   | T   | 0.073        | 0.2025  |
| <i>CHRNA6</i> | Nicotine (Exposed) | 8   | 42608381  | 0.00182 | 11   | C   | T   | -0.067       | 0.8350  |
|               |                    |     | 42611120  | 0.00182 | 0    | -   | -   | -            | -       |
|               |                    |     | 42611665  | 0.00026 | 3    | A   | G   | 0.765        | 0.2128  |
|               |                    |     | 42611723  | 0.00026 | 0    | -   | -   | -            | -       |
|               |                    |     | 42611791  | 0.00026 | 1    | G   | T   | 0.699        | 0.4595  |
|               |                    |     | 42620264  | 0.00078 | 5    | C   | T   | -0.095       | 0.8501  |
|               |                    |     | 42620320  | 0.00104 | 6    | C   | G   | 0.469        | 0.2895  |
| <i>CHRNA4</i> | Nicotine (Exposed) | 15  | 78917573  | 0.00026 | 1    | T   | C   | -1.279       | 0.1966  |
|               |                    |     | 78921323  | 0.00052 | 3    | C   | T   | 0.175        | 0.7706  |
|               |                    |     | 78921343  | 0.00598 | 35   | G   | A   | 0.289        | 0.1030  |
|               |                    |     | 78921398  | 0.00026 | 3    | A   | G   | 0.755        | 0.2439  |
|               |                    |     | 78921716  | 0.00078 | 5    | C   | T   | 0.155        | 0.7327  |
|               |                    |     | 78922229  | 0.00702 | 47   | T   | C   | -0.124       | 0.4304  |
|               |                    |     | 78922240  | 0.00884 | 54   | C   | T   | -0.014       | 0.9213  |
|               |                    |     | 78923505  | 0.04110 | 288  | G   | A   | 0.069        | 0.2669  |
| <i>CYP2A6</i> | Nicotine (Exposed) | 19  | 41351935  | 0.00078 | 3    | A   | G   | 0.040        | 0.9435  |
| <i>CYP2B6</i> | Nicotine (Exposed) | 19  | 41512841  | 0.23049 | 1581 | G   | T   | -0.033       | 0.2630  |
|               |                    |     | 41515943  | 0.23049 | 0    | -   | -   | -            | -       |
|               |                    |     | 41518204  | 0.00078 | 5    | G   | C   | 0.226        | 0.6487  |
|               |                    |     | 41518221  | 0.00026 | 3    | T   | C   | -0.250       | 0.6810  |
|               |                    |     | 41518244  | 0.00026 | 1    | C   | T   | 0.454        | 0.6309  |
|               |                    |     | 41518265  | 0.00052 | 2    | C   | T   | 0.351        | 0.6064  |
| <i>EGLN2</i>  | Nicotine (Exposed) | 19  | 41306568  | 0.00026 | 0    | -   | -   | -            | -       |
|               |                    |     | 41306650  | 0.01431 | 102  | C   | T   | -0.047       | 0.6595  |
|               |                    |     | 41307024  | 0.00052 | 3    | G   | A   | 0.478        | 0.3987  |
| <i>DBH</i>    | Nicotine (Exposed) | 9   | 136501569 | 0.00832 | 54   | G   | A   | 0.075        | 0.6054  |
|               |                    |     | 136501599 | 0.00026 | 2    | G   | A   | -0.017       | 0.9820  |
|               |                    |     | 136501728 | 0.00546 | 31   | C   | T   | -0.002       | 0.9933  |
|               |                    |     | 136501746 | 0.00026 | 1    | G   | A   | 0.247        | 0.8029  |
|               |                    |     | 136501756 | 0.00494 | 37   | G   | C   | 0.131        | 0.4582  |
|               |                    |     | 136501768 | 0.00494 | 0    | -   | -   | -            | -       |
|               |                    |     | 136501834 | 0.00234 | 15   | T   | C   | 0.617        | 0.0194  |
|               |                    |     | 136507332 | 0.00104 | 6    | G   | A   | 0.135        | 0.7316  |
|               |                    |     | 136507425 | 0.00026 | 3    | G   | A   | -0.204       | 0.7377  |

| Gene         | Phenotype          | CHR | BP        | MAF     | MAC | Ref | Alt | Alt Eff Size | p-value |
|--------------|--------------------|-----|-----------|---------|-----|-----|-----|--------------|---------|
|              |                    |     | 136507444 | 0.01977 | 142 | A   | G   | -0.145       | 0.1025  |
|              |                    |     | 136507473 | 0.04683 | 305 | G   | A   | 0.000        | 0.9995  |
|              |                    |     | 136507474 | 0.00078 | 3   | C   | T   | -0.055       | 0.9224  |
|              |                    |     | 136507528 | 0.00078 | 0   | -   | -   | -            | -       |
|              |                    |     | 136507559 | 0.00052 | 4   | G   | C   | 0.733        | 0.2072  |
|              |                    |     | 136508640 | 0.00026 | 1   | G   | A   | 1.274        | 0.1756  |
|              |                    |     | 136508658 | 0.00182 | 8   | G   | A   | -0.076       | 0.8235  |
|              |                    |     | 136508691 | 0.00052 | 2   | G   | A   | -0.373       | 0.5947  |
|              |                    |     | 136509370 | 0.08793 | 576 | G   | T   | -0.110       | 0.0153  |
|              |                    |     | 136513028 | 0.00442 | 29  | C   | T   | -0.079       | 0.6814  |
|              |                    |     | 136521654 | 0.00312 | 23  | G   | A   | 0.373        | 0.0873  |
|              |                    |     | 136521726 | 0.00078 | 6   | G   | A   | 1.398        | 0.0004  |
|              |                    |     | 136523487 | 0.00182 | 11  | A   | T   | 0.525        | 0.0926  |
|              |                    |     | 136523534 | 0.00052 | 6   | C   | T   | -0.168       | 0.6780  |
| <i>ALDH2</i> | Drinking           | 12  | 112221070 | 0.00038 | 5   | G   | C   | 0.537        | 0.2427  |
|              |                    |     | 112230413 | 0.00025 | 3   | G   | A   | -0.103       | 0.8618  |
|              |                    |     | 112241766 | 0.00013 | 1   | G   | A   | -1.052       | 0.2625  |
|              |                    |     | 100229016 | 0.00370 | 58  | C   | T   | 0.093        | 0.5162  |
|              |                    |     | 100229017 | 0.00089 | 14  | G   | A   | -0.409       | 0.1460  |
| <i>ADH1B</i> | Drinking           | 4   | 100232704 | 0.00166 | 25  | C   | T   | 0.106        | 0.6183  |
|              |                    |     | 100232773 | 0.00013 | 2   | C   | T   | 0.237        | 0.7479  |
|              |                    |     | 100239268 | 0.00229 | 41  | A   | G   | -0.172       | 0.3252  |
|              |                    |     | 100239284 | 0.00892 | 108 | T   | A   | 0.131        | 0.1830  |
|              |                    |     | 100239319 | 0.00077 | 7   | C   | T   | -0.317       | 0.3825  |
|              |                    |     | 69364311  | 0.00014 | 2   | C   | T   | 0.840        | 0.2571  |
|              |                    |     | 69583176  | 0.00014 | 3   | C   | T   | -0.651       | 0.2849  |
|              |                    |     | 69583206  | 0.00352 | 40  | A   | G   | 0.174        | 0.2942  |
| <i>AUTS2</i> | Drinking (Exposed) | 7   | 70228020  | 0.03475 | 407 | G   | T   | 0.025        | 0.6356  |
|              |                    |     | 70229770  | 0.00028 | 5   | A   | G   | -0.029       | 0.9541  |
|              |                    |     | 70255639  | 0.01548 | 186 | G   | T   | 0.200        | 0.0110  |
|              |                    |     | 70255956  | 0.00070 | 6   | A   | G   | -0.064       | 0.8757  |
|              |                    |     | 70255978  | 0.00042 | 5   | G   | A   | -0.920       | 0.0533  |
| <i>ALDH2</i> | Drinking (Exposed) | 12  | 112221070 | 0.00042 | 5   | G   | C   | 0.277        | 0.5492  |
|              |                    |     | 112230413 | 0.00028 | 3   | G   | A   | -0.349       | 0.5640  |
|              |                    |     | 112241766 | 0.00014 | 1   | G   | A   | -1.178       | 0.2174  |
|              |                    |     | 100229016 | 0.00394 | 47  | C   | T   | 0.056        | 0.7141  |
|              |                    |     | 100229017 | 0.00084 | 10  | G   | A   | -0.483       | 0.1408  |
| <i>ADH1B</i> | Drinking (Exposed) | 4   | 100232704 | 0.00141 | 18  | C   | T   | 0.187        | 0.4477  |
|              |                    |     | 100232773 | 0.00014 | 1   | C   | T   | 0.736        | 0.4464  |
|              |                    |     | 100239268 | 0.00225 | 30  | A   | G   | -0.197       | 0.3177  |
|              |                    |     | 100239284 | 0.00914 | 96  | T   | A   | 0.110        | 0.2938  |
|              |                    |     | 100239319 | 0.00056 | 5   | C   | T   | -0.536       | 0.2185  |
| <i>ALDH2</i> | Alcohol Dependence | 12  | 112221070 | 0.00038 | 5   | G   | C   | 0.240        | 0.6141  |
|              |                    |     | 112230413 | 0.00025 | 3   | G   | A   | 0.634        | 0.2998  |
|              |                    |     | 112241766 | 0.00013 | 1   | G   | A   | -0.641       | 0.5053  |
| <i>ADH1B</i> | Alcohol Dependence | 4   | 100229016 | 0.00370 | 58  | C   | T   | -0.049       | 0.7411  |
|              |                    |     | 100229017 | 0.00089 | 14  | G   | A   | -0.507       | 0.0814  |
|              |                    |     | 100232704 | 0.00166 | 25  | C   | T   | 0.243        | 0.2721  |

| Gene         | Phenotype                    | CHR | BP        | MAF     | MAC | Ref | Alt | Alt Eff Size | p-value |
|--------------|------------------------------|-----|-----------|---------|-----|-----|-----|--------------|---------|
|              |                              |     | 100232773 | 0.00013 | 2   | C   | T   | -0.268       | 0.7264  |
|              |                              |     | 100239268 | 0.00229 | 41  | A   | G   | -0.183       | 0.3175  |
|              |                              |     | 100239284 | 0.00892 | 108 | T   | A   | 0.135        | 0.1855  |
|              |                              |     | 100239319 | 0.00077 | 7   | C   | T   | -0.025       | 0.9470  |
|              |                              |     | 69364311  | 0.00014 | 2   | C   | T   | -0.083       | 0.9131  |
|              |                              |     | 69583176  | 0.00014 | 3   | C   | T   | -0.720       | 0.2474  |
|              |                              |     | 69583206  | 0.00352 | 40  | A   | G   | -0.023       | 0.8926  |
| <i>AUTS2</i> | Alcohol Dependence (Exposed) | 7   | 70228020  | 0.03475 | 407 | G   | T   | 0.045        | 0.4147  |
|              |                              |     | 70229770  | 0.00028 | 5   | A   | G   | -0.250       | 0.6245  |
|              |                              |     | 70255639  | 0.01548 | 186 | G   | T   | 0.130        | 0.1081  |
|              |                              |     | 70255956  | 0.00070 | 6   | A   | G   | 0.213        | 0.6092  |
|              |                              |     | 70255978  | 0.00042 | 5   | G   | A   | -0.734       | 0.1332  |
| <i>ALDH2</i> | Alcohol Dependence (Exposed) | 12  | 112221070 | 0.00042 | 5   | G   | C   | 0.148        | 0.7545  |
|              |                              |     | 112230413 | 0.00028 | 3   | G   | A   | 0.580        | 0.3511  |
|              |                              |     | 112241766 | 0.00014 | 1   | G   | A   | -0.740       | 0.4441  |
|              |                              |     | 100229016 | 0.00394 | 47  | C   | T   | -0.063       | 0.6875  |
|              |                              |     | 100229017 | 0.00084 | 10  | G   | A   | -0.551       | 0.1013  |
|              |                              |     | 100232704 | 0.00141 | 18  | C   | T   | 0.275        | 0.2764  |
| <i>ADH1B</i> | Alcohol Dependence (Exposed) | 4   | 100232773 | 0.00014 | 1   | C   | T   | -0.304       | 0.7569  |
|              |                              |     | 100239268 | 0.00225 | 30  | A   | G   | -0.319       | 0.1158  |
|              |                              |     | 100239284 | 0.00914 | 96  | T   | A   | 0.111        | 0.2975  |
|              |                              |     | 100239319 | 0.00056 | 5   | C   | T   | 0.118        | 0.7892  |

Alt, alternate; BP, base pair; CHR, chromosome; Eff, effect; LD, linkage disequilibrium; MAC, minor allele count; MAF, minor allele frequency; Ref, reference.

Variants with 0 MAC are in perfect LD with neighboring variant, and are set to missing to avoid double-counting.
